# Supplementary material for: Finding the optimal design of a passive microfluidic mixer
Source: Royal Society of Chemistry journal article supplement (doi:10.1039/c9lc00546c), 2019-01-01
Supplement: c9lc00546c5.pdf [file c9lc00546c5.pdf]

# Supplementary Information for *Finding the optimal design of a passive microfluidic mixer*

Junchao Wang,<sup>1,2\*</sup> Naiyin Zhang,<sup>3</sup>  
Jin Chen,<sup>1</sup> Victor G. J. Rodgers,<sup>2</sup>  
Philip Brisk,<sup>4</sup> and William H. Grover<sup>2\*</sup>

<sup>1</sup>Key Laboratory of RF Circuits and Systems, Ministry of Education,  
and Zhejiang Provincial Laboratory of Integrated Circuit Design,  
Hangzhou Dianzi University, China.

<sup>2</sup>Department of Bioengineering, University of California Riverside,  
Riverside, CA, USA.

<sup>3</sup>College of Life Information Science and Instrument Engineering,  
Hangzhou Dianzi University, China.

<sup>4</sup>Department of Computer Science and Engineering,  
University of California Riverside, Riverside, CA, USA.

## 1 Description of supplementary files

### 1.1 Video files

- *s1.mp4* is the concentration profiles of 0 to 200 generations of NSGA-II mixer designs.
- *s2.mp4* is the pressure profiles of 0 to 200 generations of NSGA-II mixer designs.
- *s3.mp4* is the velocity magnitude profiles of 0 to 200 generations of NSGA-II mixer designs.

### 1.2 Code to generate random mixer designs

The file *code.7z* contains the MATLAB script we used to generate 6069 random mixer designs.  
Program entrance
